# Supplementary material for: Crystal structure of a DNA duplex cross-linked by 6-thioguanine–6-thioguanine disulfides: reversible formation and cleavage catalyzed by Cu(ii) ions and glutathione
Source: Royal Society of Chemistry journal article supplement (doi:10.1039/c9ra03515j), 2019-01-01
Supplement: c9ra03515j1.pdf [file c9ra03515j1.pdf]

## Supporting Information

for

### Crystal structure of a DNA duplex cross-linked by 6-thioguanin–6-thioguanin disulfides: reversible formation and cleavage catalyzed by Cu(II) ion and glutathione

Akira Ono<sup>a\*</sup>, Takahiro Atsugi<sup>a</sup>, Misato Goto<sup>a</sup>, Hisao Saneyoshi<sup>a</sup>, Takahito  
Tomori<sup>b</sup>, Kohji Seio<sup>b</sup>, Jiro Kondo<sup>c\*</sup>

#### Table of Contents

Page 2; Materials and methods

Page 3; **Table S1.** Crystal data and statistics of data collection and structure refinement

Page 4; **Figure S1.** Disulfide-bonded base pairs between 6-thio-G residues with  $2|F_o|-|F_c|$  map

Page 5-6; **Figure S2, Figure S3.** Cleavage of the disulfide bonds by glutathione.

Page 7; **Figure S4.** Treatment of the duplex with  $\text{KBrO}_3$ .

Page 8; References

## MATERIALS AND METHODS

DNA dodecamer with a sequence d(CGCGAXXBCGCG) (**ODN-I** hereafter) where X and B residues are 2'-deoxy-6-thioguanosine and 2'-deoxy-5-bromouridine, respectively, were synthesized by a DNA synthesizer and then purified by HPLC and reversed-phase chromatography. A monomer unit for 2'-deoxy-6-thioguanosine residue was purchased from Glen Research corp., and used according to an instruction of the manufacture.

Prior to crystallization, 2 mM DNA was mixed with 2 mM copper(II) chloride at room temperature. Crystallizations were performed by the hanging-drop vapor diffusion method. Single crystals were obtained in a droplet prepared by merging 1  $\mu$ l of DNA/copper(II) mixed solution mentioned above and 1  $\mu$ l of crystallization solution containing 50 mM MOPS (pH 7), 10 mM spermine, 250 mM ammonium nitrate and 10% 2-methyl-2,4-pentanediol, which was equilibrated against 250  $\mu$ l of 40% 2-methyl-2,4-pentanediol.

A single crystal was scooped from a droplet by a cryo-loop (Hampton Research) and then frozen immediately in liquid nitrogen. An X-Ray diffraction dataset was collected at structural biology beamline BL-17A in Photon Factory (Tsukuba, Japan). The X-ray data was processed by the program *XDS* (Kabsch 2010). The initial phase was determined by the Single-wavelength Anomalous Dispersion (SAD) method using the program *AutoSol* in the *Phenix suite* (Adams *et al.*, 2010; Grosse-Kunstleve *et al.*, 2003; Terwilliger *et al.*, 2009). The molecular structure was constructed and manipulated with the program *Coot* (Emsley *et al.*, 2004, 2010). The atomic parameters were refined with the program *phenix.refine* from the *Phenix suite* (Adams *et al.*, 2010; Afonine *et al.*, 2012) through a combination of simulated-annealing, crystallographic conjugate gradient minimization refinements and B-factor refinement. Molecular drawings of the structure were performed by the program *PyMOL* (DeLano 2008). The statistics of data collection and structure refinement are summarized in Table S1. The atomic coordinate and experimental data of the structure have been deposited in the Protein Data Bank (PDB) with the ID code 6YIQ.

HPLC was performed on a reverse phase silica gel column (7.6 $\times$ 250 mm) (Inertsil ODS-3; GL Science Inc., Japan) with a linear gradient of CH<sub>3</sub>CN in 0.1 M triethylammonium acetate buffer (pH 6.8) with a flow rate 1 mL/min.

**Table S1.** Crystal data and statistics of data collection and structure refinement

| <u>Crystal data</u>                        |                                                   |
|--------------------------------------------|---------------------------------------------------|
| Space group                                | <i>I</i> 222                                      |
| Unit cell (Å)                              | <i>a</i> = 45.3, <i>b</i> = 46.5, <i>c</i> = 76.1 |
| No. of DNA strands in AU <sup>a</sup>      | 2                                                 |
| <u>Data collection</u>                     |                                                   |
| Beamline                                   | BL-17A                                            |
| Wavelength (Å)                             | 0.91942                                           |
| Resolution (Å)                             | 39.7 - 2.0                                        |
| of the outer shell (Å)                     | 2.1 - 2.0                                         |
| Unique reflections                         | 5619                                              |
| Completeness (%)                           | 99.8                                              |
| in the outer shell (%)                     | 98.8                                              |
| <i>R</i> <sub>merge</sub> <sup>b</sup> (%) | 4.4                                               |
| in the outer shell (%)                     | 28.7                                              |
| Redundancy                                 | 6.2                                               |
| in the outer shell                         | 6.7                                               |
| <i>I</i> / $\sigma$ ( <i>I</i> )           | 19.2                                              |
| in the outer shell                         | 5.2                                               |
| <u>Structure refinement</u>                |                                                   |
| Resolution range (Å)                       | 39.7 - 2.0                                        |
| Used reflections                           | 5598                                              |
| <i>R</i> -factor <sup>c</sup> (%)          | 24.7                                              |
| <i>R</i> <sub>free</sub> <sup>d</sup> (%)  | 28.2                                              |
| R.m.s.d. bond length (Å)                   | 0.013                                             |
| R.m.s.d. bond angles (°)                   | 1.4                                               |

<sup>a</sup> Number of nucleic acid strands in the asymmetric unit.

<sup>b</sup>  $R_{\text{merge}} = 100 \times \sum_{hklj} |I_{hklj} - \langle I_{hklj} \rangle| / \sum_{hklj} \langle I_{hklj} \rangle$ .

<sup>c</sup> *R*-factor =  $100 \times \sum (|F_o| - |F_c|) / \sum |F_o|$ , where  $|F_o|$  and  $|F_c|$  are optimally scaled observed and calculated structure factor amplitudes, respectively.

<sup>d</sup> Calculated using a random set containing 10% of observations.

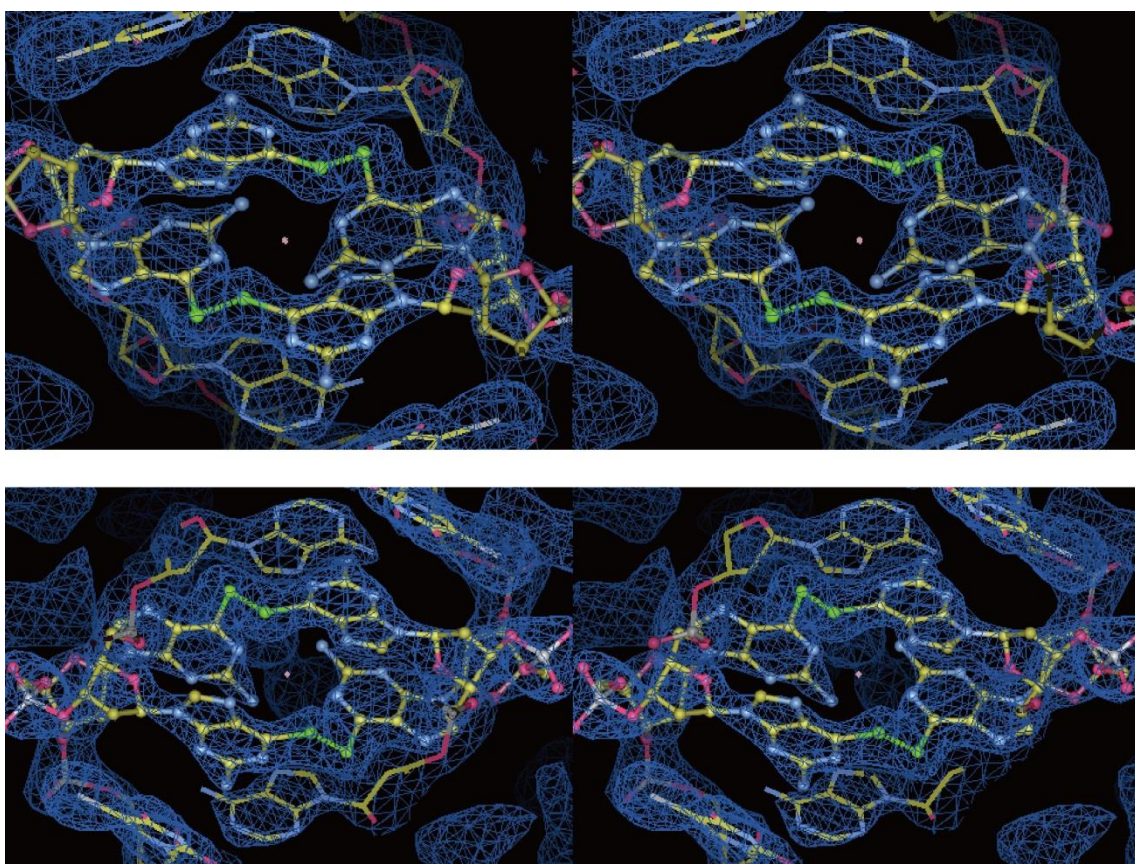

**Figure S1.** Disulfide-bonded base pairs between 6-thio-G residues with  $2|F_o|-|F_c|$  map (blue mesh:  $2\sigma$  contour level). 6-thio-G residues are illustrated in ball-and-stick model. Views are from the minor (above) and major (below) grooves of the two consecutive disulfide-bonded base pairs.

### Cleavage of the disulfide bonds by glutathione (GSH).

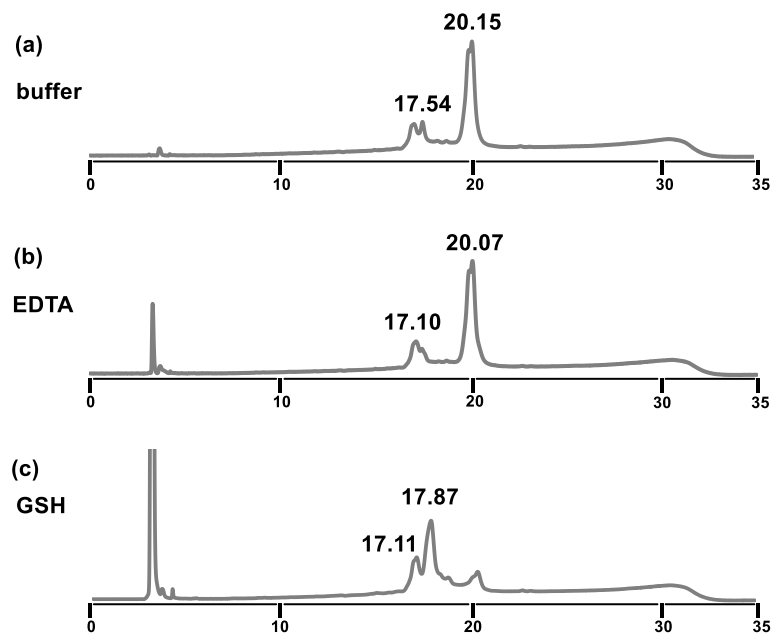

**Figure S2.** HPLC profiles of solutions in Fig. S3. A linear gradient of CH<sub>3</sub>CN from 7 % to 21% (20 min) to 28% (5 min) was used.

Experimental procedures are shown in Fig. S3. A solution containing **duplex-I'** and Cu(II) ions were kept at room temperature for overnight. Formation of **duplex-I'ss** was confirmed by HPLC (Fig. S2a). The solution was separated and appropriately diluted to give solutions containing EDTA, or GSH. Solutions were kept at room temperature overnight and analyzed by HPLC (Fig. S2b, c).

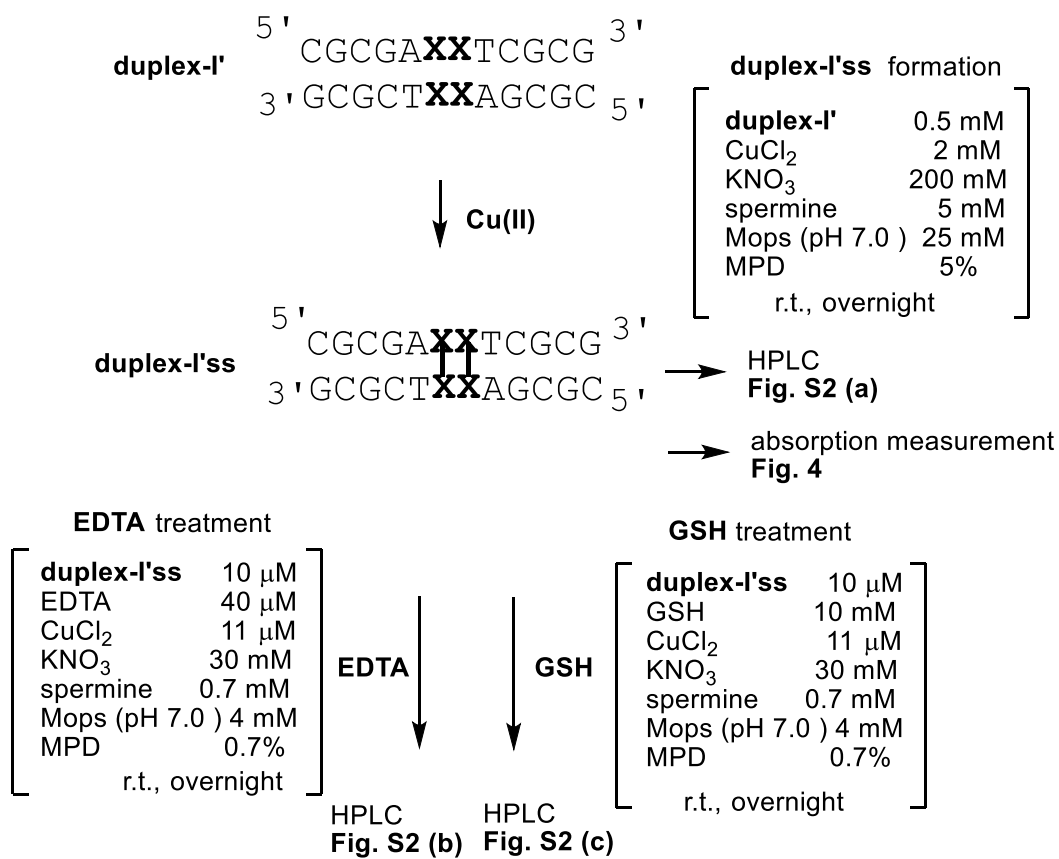

**Figure S3.** A schematic representation for experiments. In order to prepare **duplex-I'ss** for HPLC analyses and absorption measurement (Fig. 4), the amount of **duplex-I'** was larger than that in Fig. 3b.

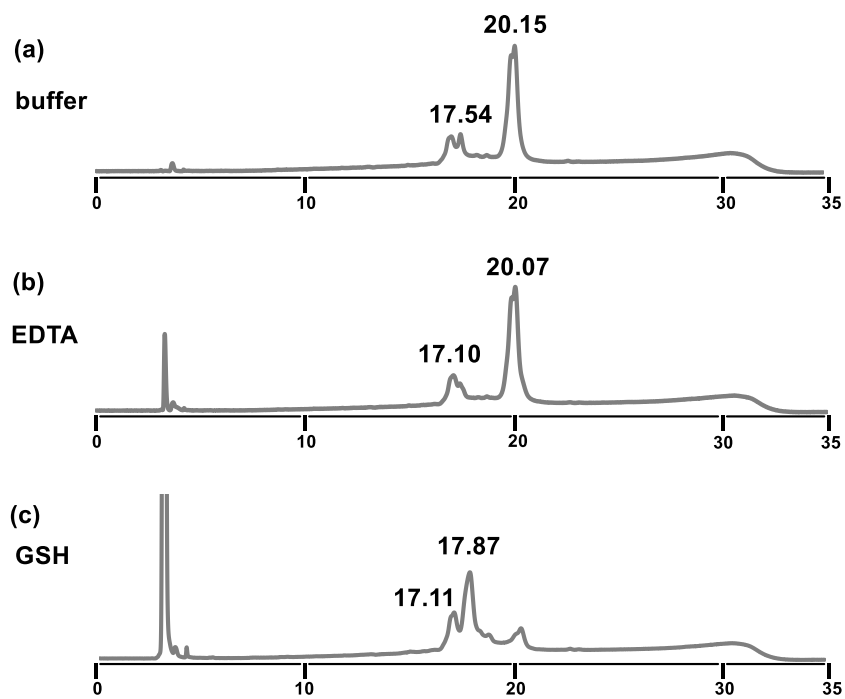

**Figure S3.** HPLC profiles of solutions in Fig. S2. A linear gradient of CH<sub>3</sub>CN from 7 % to 21% (20 min) to 28% (5 min) was used.

### Effect of $\text{KBrO}_3$ for disulfide bonds formation.

In to solutions containing **duplex-I'** were added  $\text{Cu(II)}$  ions or  $\text{KBrO}_3$ , and solutions were kept at roomtemperature for 24h.

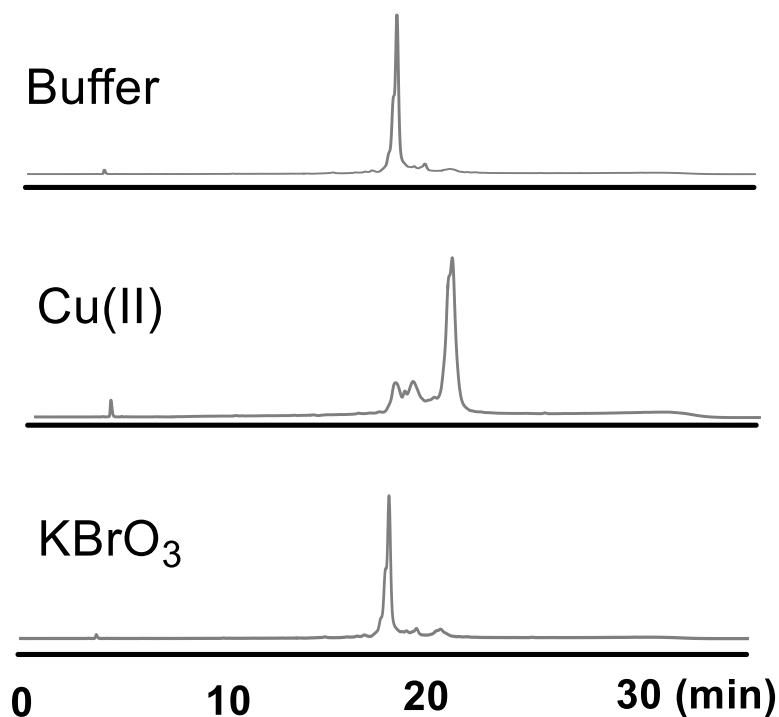

**Figure S4.** HPLC profiles of solutions.

- (a) **duplex-I'** 1 mM  
KNO<sub>3</sub> 400 mM  
Mops (pH 7.0) 50 mM
- (b) **duplex-I'** 1 mM  
CuCl<sub>2</sub> 2 mM  
KNO<sub>3</sub> 400 mM  
Mops (pH 7.0) 50 mM
- (c) **duplex-I'** 1 mM  
KBrO<sub>3</sub> 2 mM  
KNO<sub>3</sub> 400 mM  
Mops (pH 7.0) 50 mM

A linear gradient of  $\text{CH}_3\text{CN}$  from 7 % to 21% (20 min) to 28% (5 min) was used.



## REFERENCES

- Adams, P. D., et al. (2010). "PHENIX: a comprehensive Python-based system for macromolecular structure solution." *Acta Crystallogr D Biol Crystallogr* **66**(Pt 2): 213-221.
- Afonine, P. V., et al. (2012). "Towards automated crystallographic structure refinement with phenix.refine." *Acta Crystallogr D Biol Crystallogr* **68**(Pt 4): 352-367.
- DeLano W. L. (2008) "The PyMOL Molecular Graphics System" DeLano Scientific LLC, Palo Alto, CA, USA
- Emsley, P. and K. Cowtan (2004). "Coot: model-building tools for molecular graphics." *Acta Crystallogr D Biol Crystallogr* **60**(Pt 12 Pt 1): 2126-2132.
- Emsley, P., et al. (2010). "Features and development of Coot." *Acta Crystallogr D Biol Crystallogr* **66**(Pt 4): 486-501.
- Grosse-Kunstleve, R. W. and P. D. Adams (2003). "Substructure search procedures for macromolecular structures." *Acta Crystallographica Section D* **59**(11): 1966-1973.
- Kabsch, W. (2010). "Xds." *Acta Crystallogr D Biol Crystallogr* **66**(Pt 2): 125-132.
- Terwilliger, T. C., et al. (2009). "Decision-making in structure solution using Bayesian estimates of map quality: the PHENIX AutoSol wizard." *Acta Crystallographica Section D* **65**(6): 582-601.
